# Supplementary material
Source: ML conference proceedings conference paper supplement (https://openaccess.thecvf.com/content/CVPR2021/html/Liu_iMiGUE_An_Identity-Free_CVPR_2021_paper.html)
Supplement: Supplementary file 1 [file Liu_iMiGUE_An_Identity-Free_CVPR_2021_supplemental.pdf]

# iMiGUE: An Identity-free Video Dataset for Micro-Gesture Understanding and Emotion Analysis

## Supplementary Material

Xin Liu<sup>†</sup>, Henglin Shi<sup>‡</sup>, Haoyu Chen<sup>‡</sup>, Zitong Yu<sup>‡</sup>, Xiaobai Li<sup>‡</sup>, Guoying Zhao<sup>‡</sup>

<sup>‡</sup>Center for Machine Vision and Signal Analysis, University of Oulu, Finland

<sup>†</sup>School of Electrical and Information Engineering, Tianjin University, China

linuxsino@gmail.com, {firstname.lastname}@oulu.fi

<https://github.com/linuxsino/iMiGUE>

### 1. iMiGUE Evaluation Protocols

In the proposed iMiGUE dataset, a two-level criteria has been defined. More specifically, on the MG recognition level, we utilized the cross-subject evaluation protocol which divides the 72 subjects into a training group of 37 subjects and a testing group of 35 subjects. The training and testing sets have 13 936 and 4 563 MG samples, respectively. The subject IDs of training and testing are:

Training set: {2, 4, 5, 6, 9, 10, 12, 13, 14, 15, 17, 18, 20, 21, 22, 23, 25, 28, 29, 30, 31, 35, 36, 38, 39, 41, 42, 43, 44, 46, 47, 48, 52, 53, 59, 61, 62};

Testing set: {1, 3, 7, 8, 11, 16, 19, 24, 26, 27, 32, 33, 34, 37, 40, 45, 49, 50, 51, 54, 55, 56, 57, 58, 60, 63, 64, 65, 66, 67, 68, 69, 70, 71, 72}.

On the emotion classification level, we selected 102 videos (51 win and 51 lose matches) as the training set, and 100 videos (50 win and 50 lose matches) as the test set. The player’s emotional states (positive/negative) with the result of win or lose, are classified via analysis of micro-gestures. The video IDs of training and testing are:

Training set: {1, 7, 8, 11, 26, 27, 46, 47, 48, 53, 55, 57, 63, 66, 67, 74, 77, 84, 85, 86, 91, 96, 102, 103, 104, 105, 106, 108, 109, 112, 114, 117, 124, 132, 134, 140, 148, 157, 161, 162, 163, 164, 167, 169, 170, 172, 176, 186, 196, 216, 233, 236, 237, 239, 240, 241, 242, 243, 249, 252, 266, 290, 297, 300, 306, 310, 314, 318, 319, 320, 324, 334, 339, 359, 360, 365, 369, 377, 381, 385, 392, 402, 407, 410, 411, 413, 414, 415, 420, 429, 433, 435, 436, 440, 441, 445, 448, 449, 450, 451, 452, 453};

Testing set: {9, 10, 12, 16, 28, 35, 43, 49, 50, 51, 52, 54, 56, 60, 71, 72, 83, 89, 95, 100, 107, 110, 111, 121, 131, 136, 144, 145, 165, 166, 168, 171, 174, 179, 185, 191, 193, 212, 220, 223, 230, 231, 232, 234, 235, 238, 244, 246, 254,

258, 262, 263, 268, 270, 276, 280, 282, 303, 304, 311, 312, 313, 315, 316, 317, 322, 323, 325, 327, 328, 329, 333, 337, 341, 343, 344, 363, 374, 400, 401, 403, 404, 405, 406, 408, 416, 417, 419, 421, 428, 430, 431, 437, 438, 439, 442, 443, 444, 446, 447}.
